# Supplementary material for: Messenger RNA sequencing and pathway analysis provide novel insights into the biological basis of chickens’ feed efficiency
Source: PubMed Central journal article supplement (PMC4414306; doi:10.1186/s12864-015-1364-0), 2015-03-17

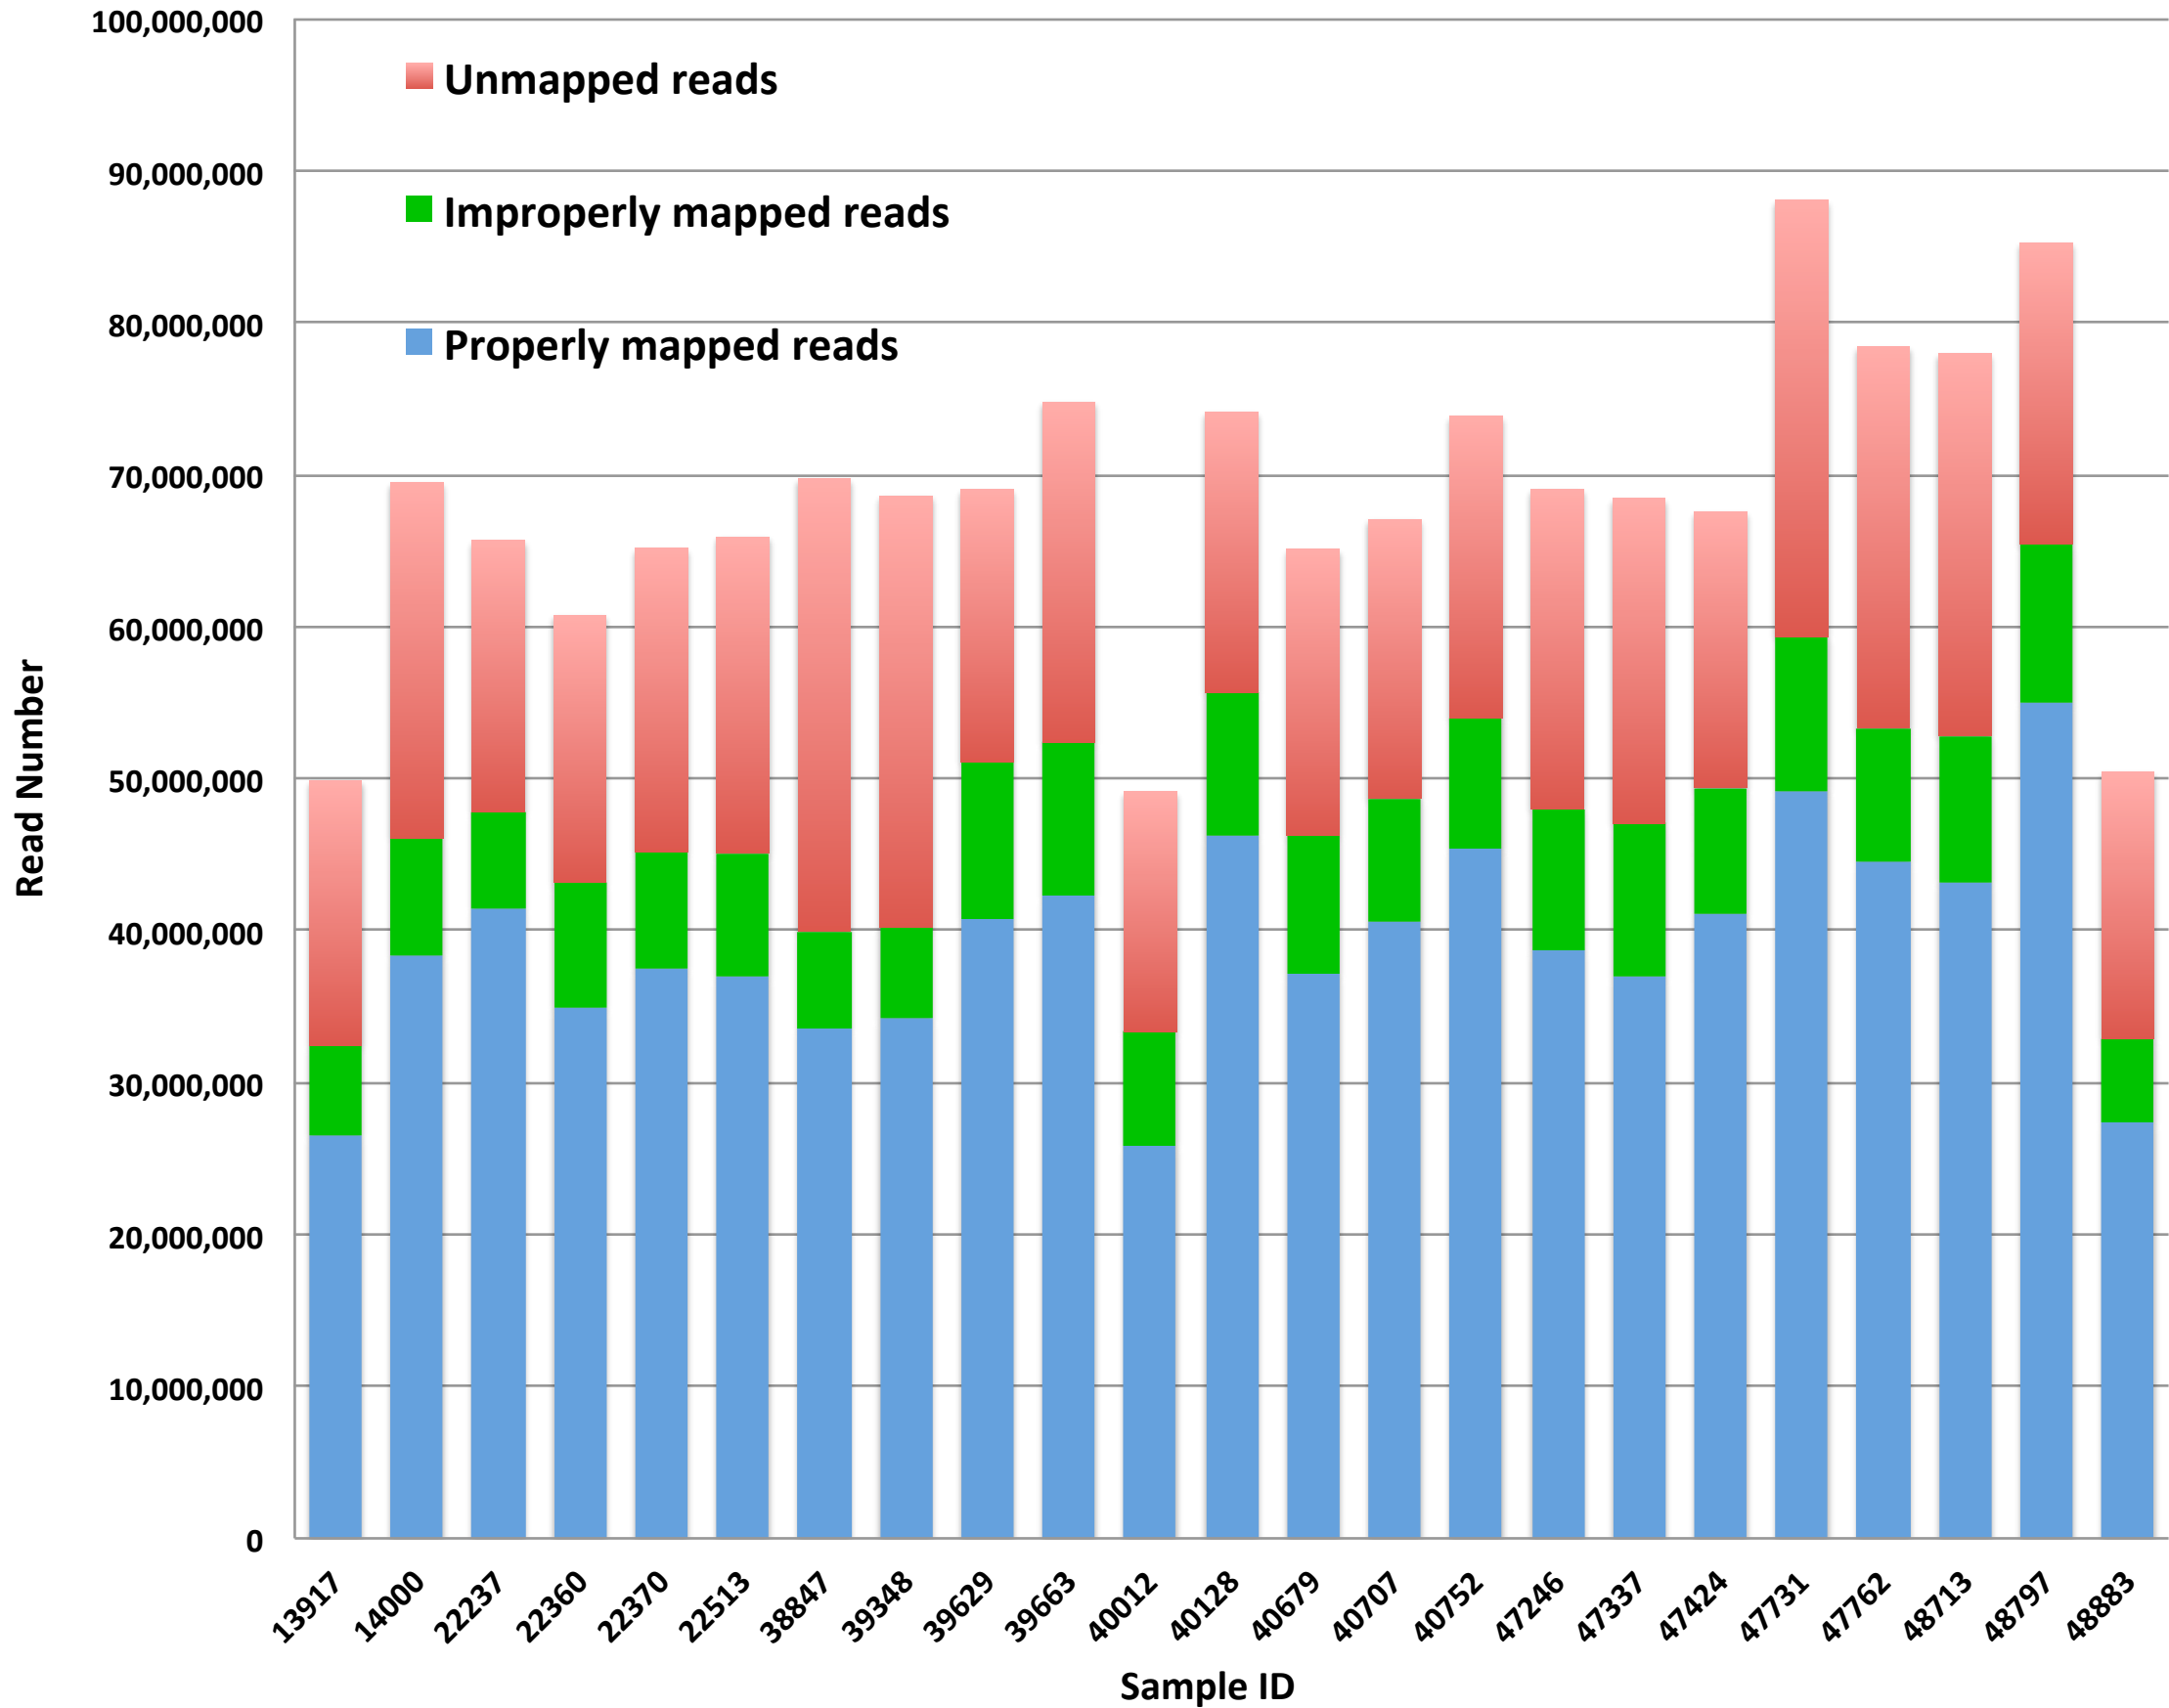

Supplement: 12864_2015_1364_MOESM1_ESM.pdf [file 12864_2015_1364_MOESM1_ESM.pdf]
